# Supplementary material for: Ets1 Controls the Development of B Cell Autoimmune Responses in a Cell-Intrinsic Manner
Source: PubMed Central journal article supplement (PMC7008956; doi:10.4049/immunohorizons.1900033), 2019-07-17
Supplement: NIHMS1552542-supplement-1.pdf [file NIHMS1552542-supplement-1.pdf]

# Supplemental Figure 1

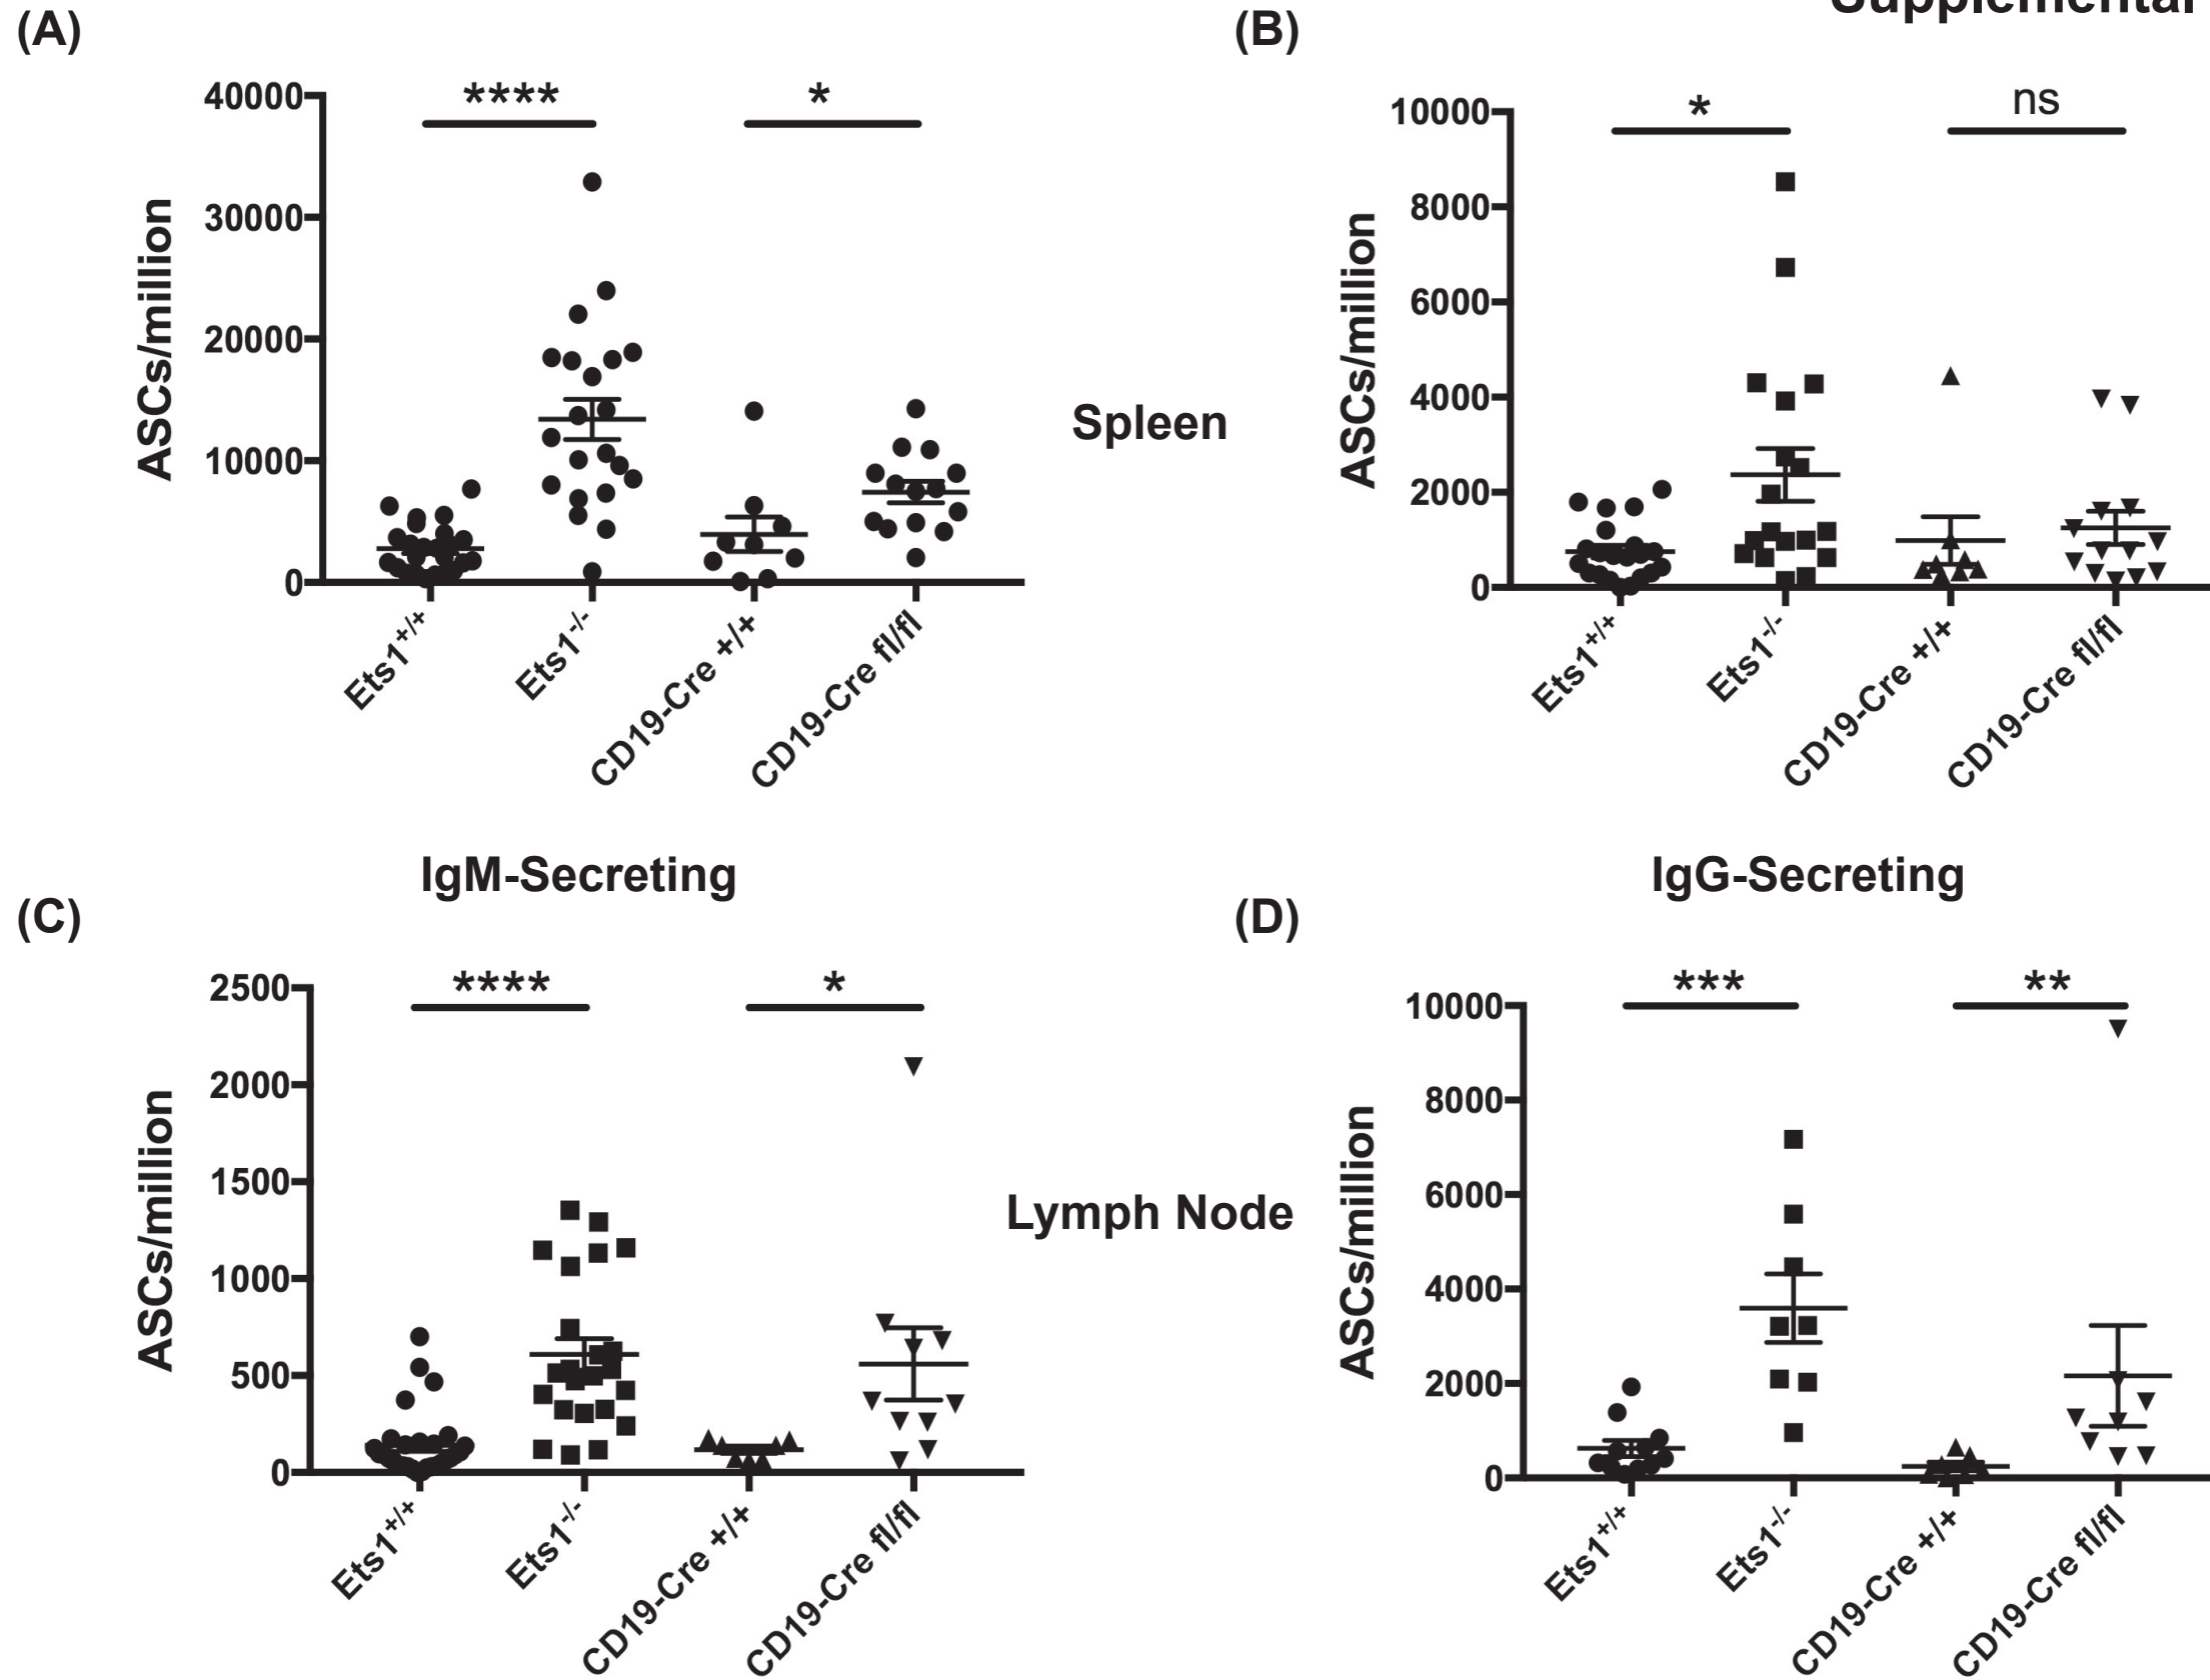

**Supplemental Figure 1. CD19-Cre *Ets1*<sup>fl/fl</sup> mice have increased numbers of ASCs by ELISPOT.** Quantification of IgM and IgG antibody-secreting cells in spleen and lymph nodes using ELISPOT. (Top) Spleen cells. (Bottom) Lymph Node cells (n 7-20= mice). (n=20 *Ets1*<sup>+/+</sup>, 20 *Ets1*<sup>-/-</sup>, 9 CD19-Cre *Ets1*<sup>+/+</sup> and 14 CD19-Cre *Ets1*<sup>fl/fl</sup> mice) -\**p*<0.05; \*\**p*<0.01; \*\*\**p*<0.001; \*\*\*\**p*<0.0001; ns – not significant.

# Supplemental Figure 2

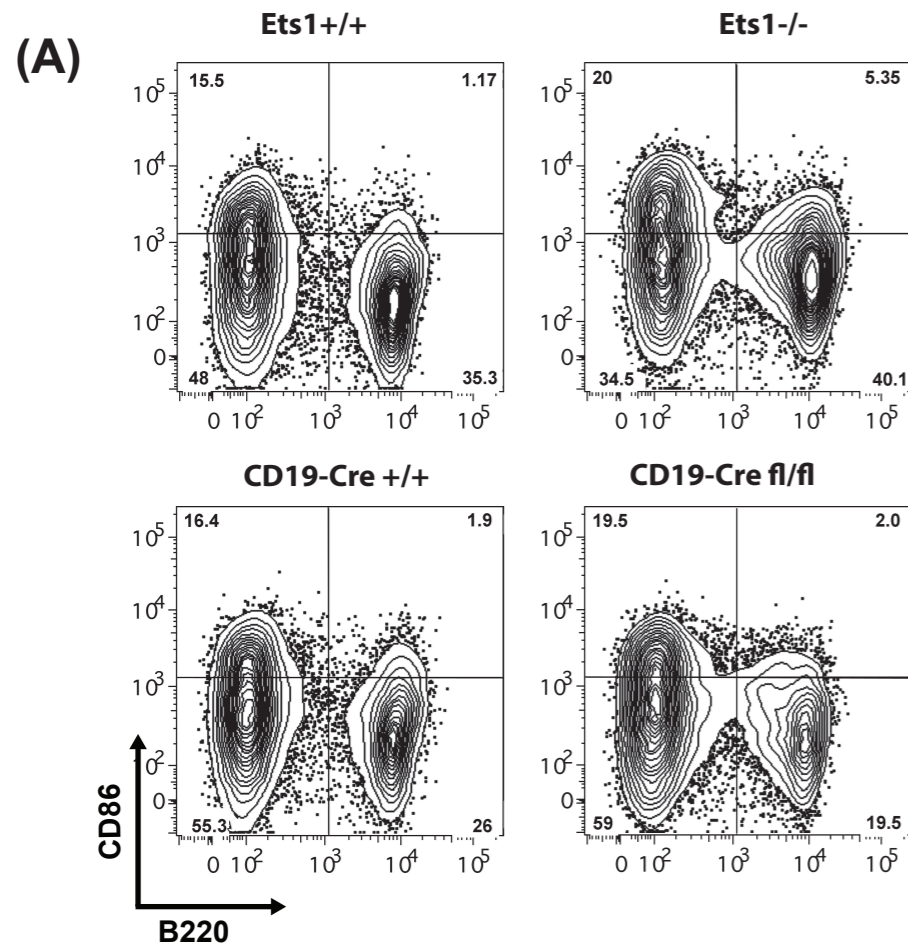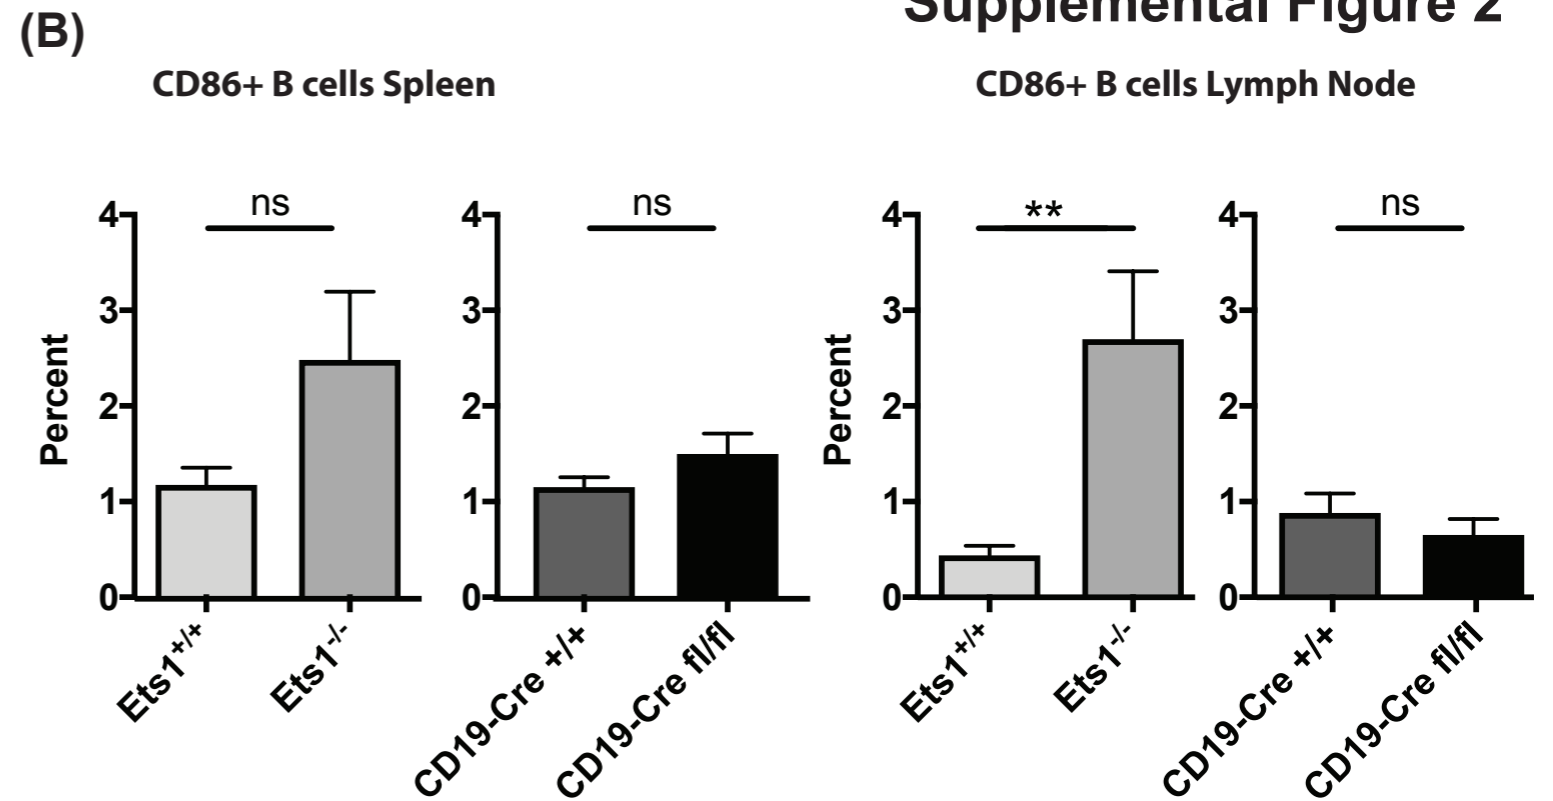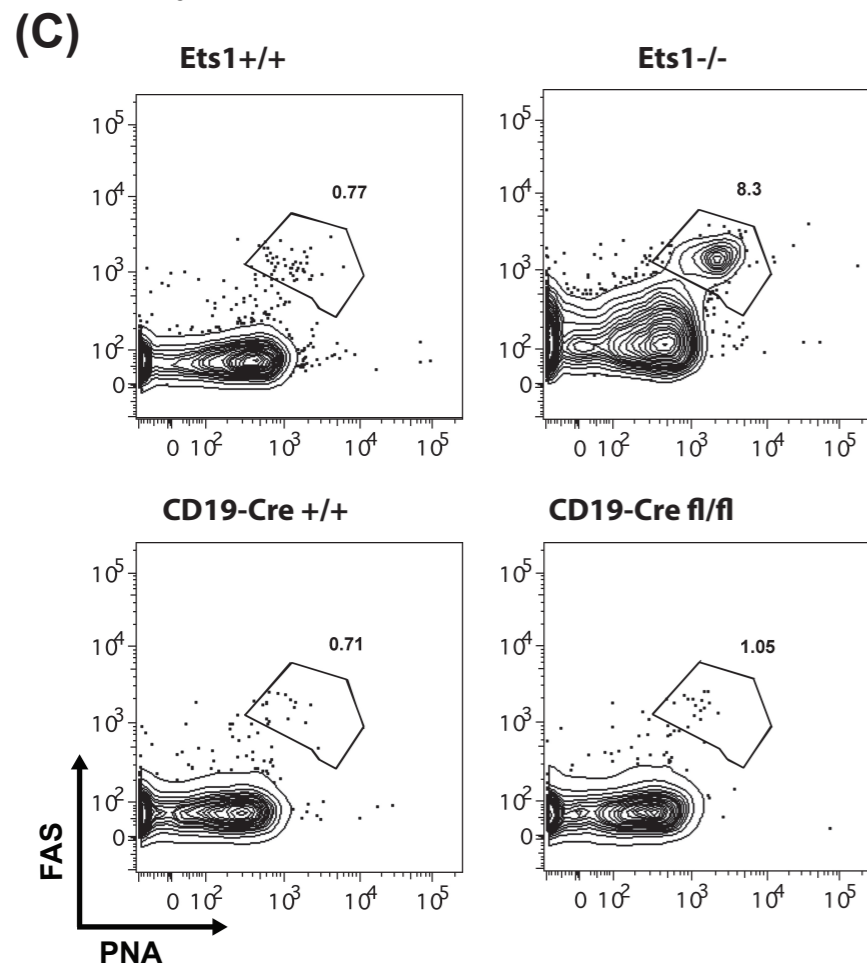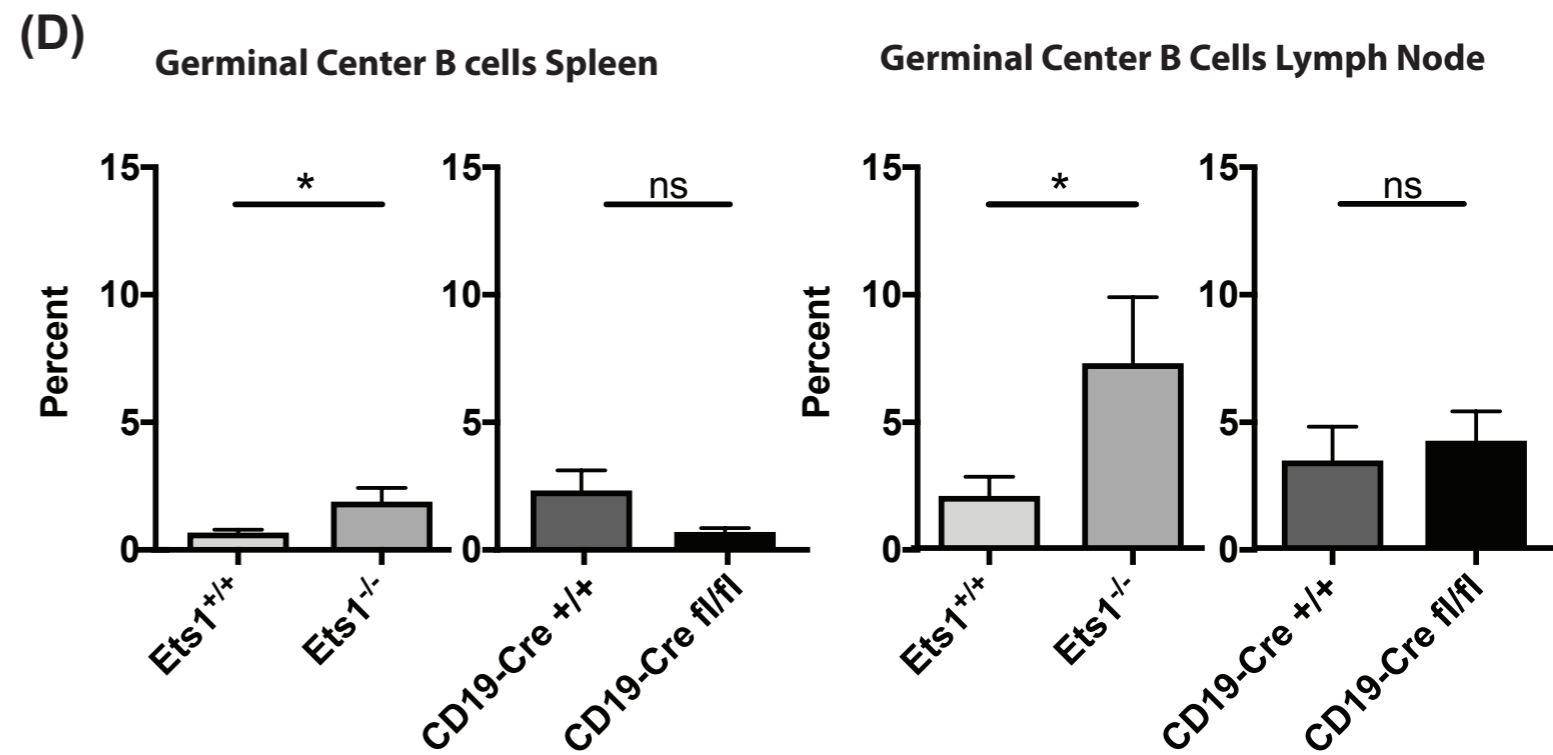

**Supplemental Figure 2. *Ets1*<sup>-/-</sup> mice, but not *CD19-Cre Ets1*<sup>fl/fl</sup> mice, have increases in CD86+ B cells and germinal center B cells.** (A) Flow cytometry analysis of B220 versus CD86 in gated live spleen cells showing that *Ets1*<sup>-/-</sup> mice, but not *CD19-Cre Ets1*<sup>fl/fl</sup> mice, have increased percentages of CD86+ B cells. (B) Quantification of the percentages of CD86+ B cells in spleen and lymph nodes of the various strains of mice (n=8 *Ets1*<sup>+/+</sup>, 6 *Ets1*<sup>-/-</sup>, 11 *CD19-Cre Ets1*<sup>+/+</sup> and 8 *CD19-Cre Ets1*<sup>fl/fl</sup> mice). (C) Flow cytometry analysis of PNA versus Fas staining in gated live, B220+ spleen cells showing that *Ets1*<sup>-/-</sup> mice, but not *CD19-Cre Ets1*<sup>fl/fl</sup> mice, have increased percentages of germinal center B cells. (D) Quantification of the percentages of germinal center B cells in the spleen and lymph nodes of the various strains of mice (n=10 *Ets1*<sup>+/+</sup>, 8 *Ets1*<sup>-/-</sup>, 11 *CD19-Cre Ets1*<sup>+/+</sup> and 8 *CD19-Cre Ets1*<sup>fl/fl</sup> mice). \*p<0.05; \*\*p<0.01; ns – not significant.

# Supplemental Figure 3

## Spleen

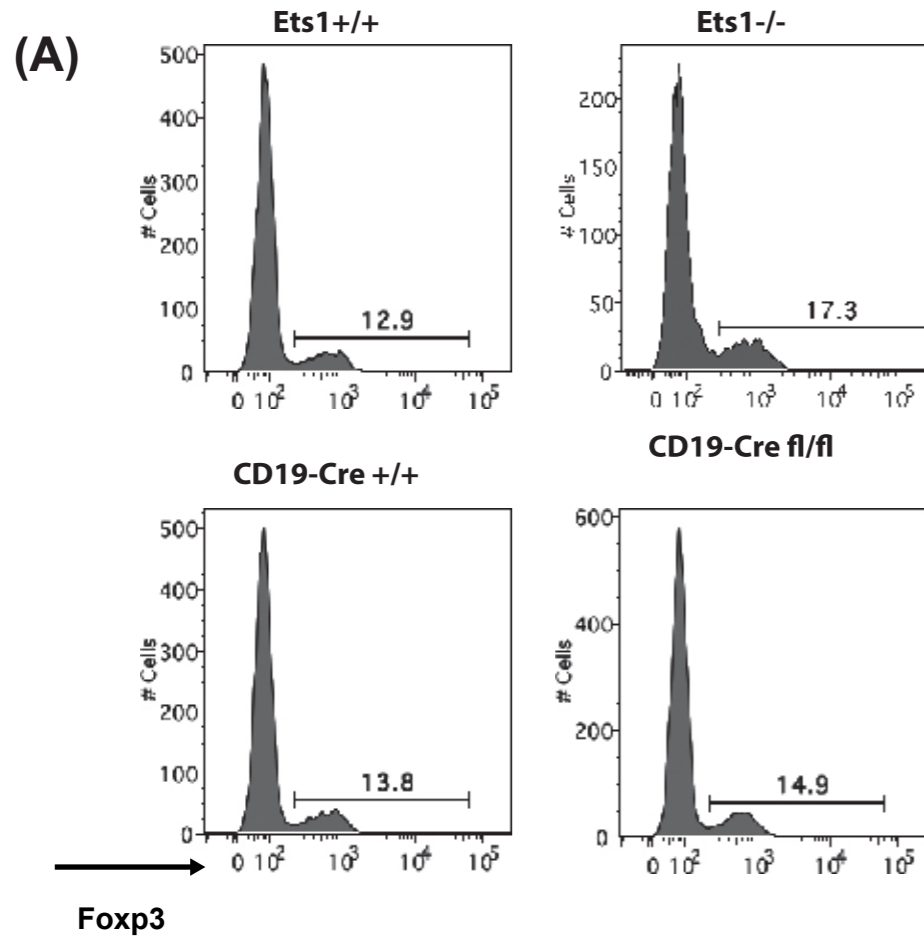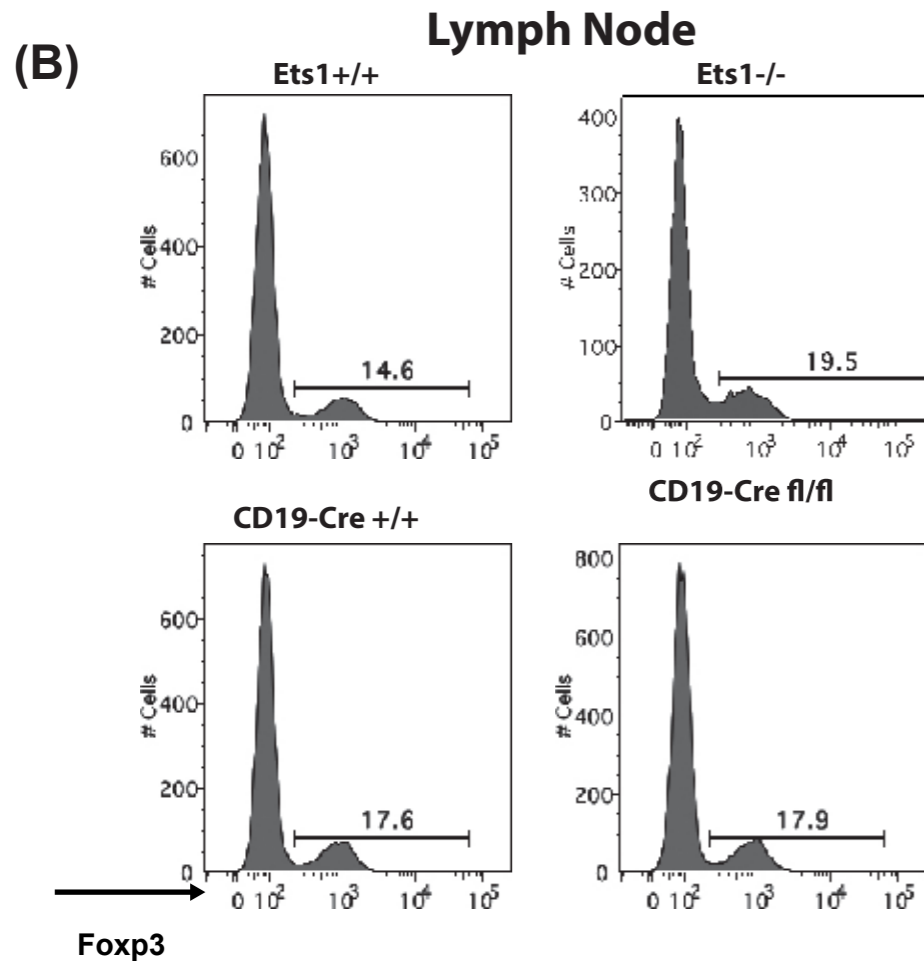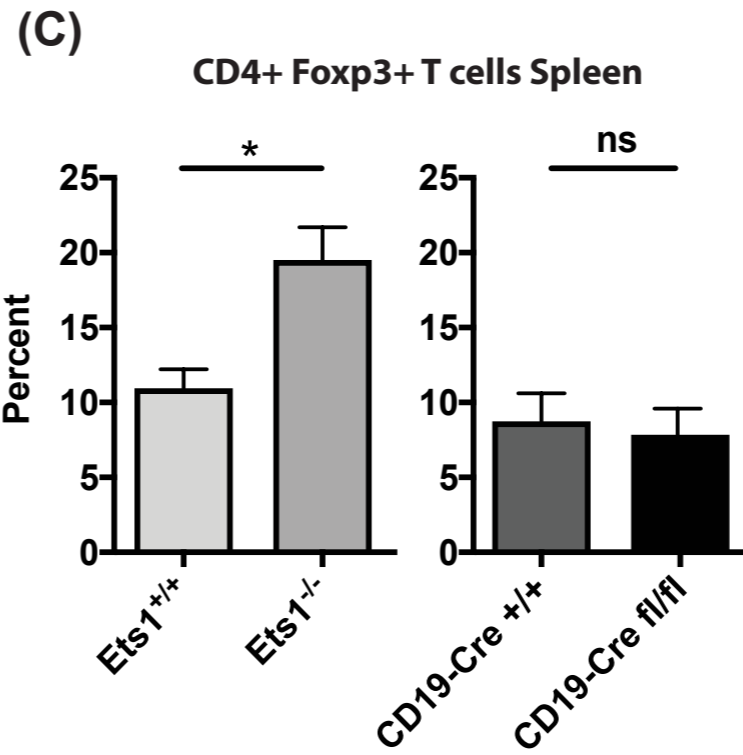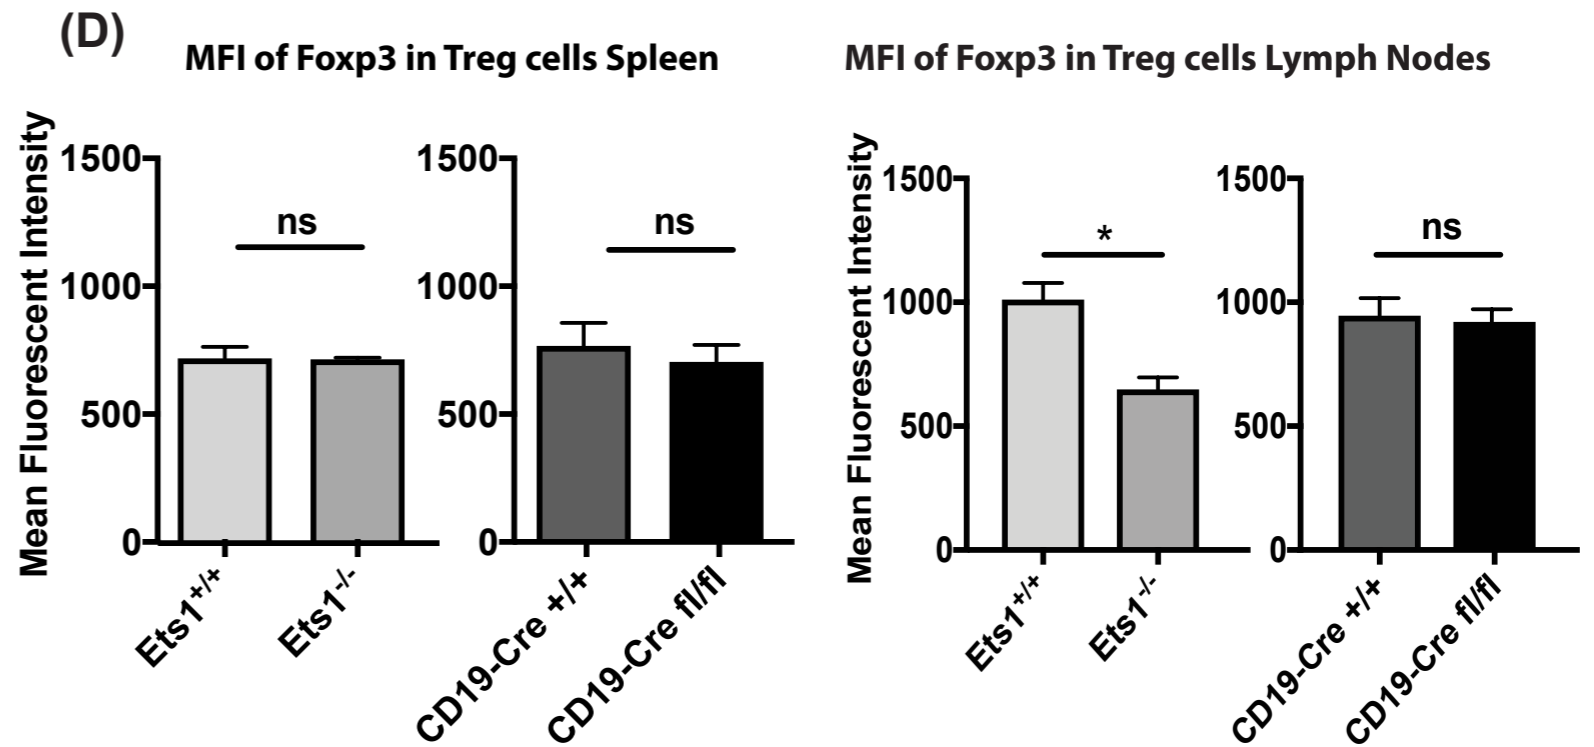

**Supplemental Figure 3. Ets1<sup>-/-</sup> mice have increased percentages of CD4<sup>+</sup>Foxp3<sup>+</sup> regulatory T cells, although the intensity of Foxp3 staining is reduced in Tregs from lymph nodes of Ets1<sup>-/-</sup> mice.** (A-B) Flow cytometry analysis of Foxp3 staining in gated live CD4<sup>+</sup> spleen and lymph node T cells. (C) Quantification of the percentages of Foxp3<sup>+</sup> CD4<sup>+</sup> T cells in spleen and lymph nodes of the various strains of mice (n=3 Ets1<sup>-/-</sup> mice and 5 mice of the other genotypes). (D) Quantification of the mean fluorescent intensity (MFI) of Foxp3 staining in live CD4<sup>+</sup>Foxp3<sup>+</sup> T cells in the spleen and lymph nodes of the various strains of mice. \*p<0.05; ns – not significant.
